# Supplementary material for: Interpenetrating polymer networks for desalination and water remediation: a comprehensive review of research trends and prospects
Source: Royal Society of Chemistry journal article supplement (doi:10.1039/d2ra07843k), 2023-01-01
Supplement: d2ra07843k1.pdf [file d2ra07843k1.pdf]

## Supporting Information

### **Interpenetrating polymer networks for desalination and water remediation: A comprehensive review of research trends and prospects**

Soumi Dutta, Ria Sen Gupta, Shabnam Pathan, and Suryasarathi Bose\*

Department of Materials Engineering, Indian Institute of Science, Bengaluru – 560012, India

\*Corresponding Author

| Sl. No | IPN system                                                                                                                                                                     | Types of IPN | Desalination application and remarks                                                        | References            |
|--------|--------------------------------------------------------------------------------------------------------------------------------------------------------------------------------|--------------|---------------------------------------------------------------------------------------------|-----------------------|
| 1      | Interpenetrating polymer network of Poly(acrylic acid-co-ethyleneglycol dimethacrylate) (XPAA) and ethoxylated polyethyleneimine (EPEI)                                        | Full IPN     | NaCl from water by a thermally reversible (Sirotherm) process using 3000 mg L <sup>-1</sup> | (Chanda et al., 2010) |
| 2      | Hydrogels of N-isopropylacrylamide (NIPAm) in the presence of polysodium acrylate (PSA) or polyvinyl alcohol (PVA)                                                             | Semi IPNs    | Temperature cycle driven FO desalination at 2000 ppm NaCl concentration                     | (Cai et al., 2013)    |
| 3      | Hydrophobic/hydrophilic interpenetrating network composite nanofibers (HH-IPN-CNF) using polyethylene terephthalate (PET) as hydrophobic component and polyvinyl alcohol (PVA) | Full IPN     | Water flux of 47.2 LMH and low salt leakage (9.5 gMH) at 0.5 M NaCl solution                | (Tian et al., 2014)   |
| 4      | Cation exchange membrane of polystyrene/PVDF                                                                                                                                   | Semi IPN     | 96% electro dialysis desalination 2000 ppm                                                  | (Lei et al., 2014)    |
| 5      | Microporous PVDF-PDMS membrane                                                                                                                                                 | Semi IPN     | 99.9% NaCl removal at 30 g L <sup>-1</sup> concentration                                    | (Sun et al., 2017)    |

|    |                                                                                                                                             |           |                                                                                        |                        |
|----|---------------------------------------------------------------------------------------------------------------------------------------------|-----------|----------------------------------------------------------------------------------------|------------------------|
| 6  | PDMS/PVDF membranes                                                                                                                         | Semi IPNs | 99.9% NaCl rejection in vacuum membrane distillation                                   | (Qu et al., 2018)      |
| 7  | Cation exchange membranes using PVC-St/DVB /SGO based IPN CEM                                                                               | Full IPN  | 82% NaCl rejection by electrodialysis.                                                 | (Rajput et al., 2018)  |
| 8  | Polyamide (PA) and poly (N-vinyl-2-pyrrolidone) (PVP)                                                                                       | Semi IPNs | Water flux and salt rejection increased 43.2% and 0.2% (2000 ppm NaCl)                 | (C. Wang et al., 2021) |
| 9  | MOF-incorporated Cu-based alginate/PVA hydrogel (MOF-Alg(Cu)/PVA) beads                                                                     | Full IPN  | 43% NaCl at 10000 ppm by Ion adsorption desalination technique                         | (Lee et al., 2021)     |
| 10 | Crosslinked poly(2-acrylamido-2-methyl-1-propanesulfonic acid-co-acrylamide) (P(AMPS-AM)) and linear polyelectrolyte polyacrylic acid (PAA) | Semi IPNs | Water flux of 2.20 L m <sup>-2</sup> h <sup>-1</sup> (LMH) from 2000 ppm NaCl solution | (Xu et al., 2022)      |

Table S2: Dye removal using IPN architecture

| Sl. No. | IPN system                                                                                                   | Type of IPN           | Dye removal efficiency and remarks                                                                          | References                 |
|---------|--------------------------------------------------------------------------------------------------------------|-----------------------|-------------------------------------------------------------------------------------------------------------|----------------------------|
| 1.      | IPN gel beads from SA, MAPTAC (3-(methacrylamido) propyl trimethyl ammonium chloride) and/or AM (acrylamide) | Semi IPN              | Adsorption of cationic dye Taiacryl Brilliant Red 4GN: 21 mg g <sup>-1</sup>                                | (Kusuktham, 2006)          |
| 2.      | Sodium alginate/acrylamidesemi-interpenetrating polymer networks ((NaAlg/AAm)IPN)                            | Semi IPN              | Adsorption capacity followed the order: Magenta< Safranine-O<Methylene Blue< Methyl Violet                  | (Şolpan et al., 2008)      |
| 3.      | Polystyrene/polyamide macroporous crosslinked IPN                                                            | Full IPN              | Adsorption of quercetin pigment: 8.6 mg mL <sup>-1</sup>                                                    | (Liao et al., 2010)        |
| 4.      | poly (acrylamide-co-acrylic acid) and polyvinylalcohol hydrogels                                             | Semi IPN              | MB: Removal 95%                                                                                             | (Zendehdel et al., 2010)   |
| 5.      | Cross-Linked Chitosan-Poly(acrylamide) Adsorbent Hydrogels                                                   | Full IPN              | Adsorption of EY-4GL: 64.5 mg g <sup>-1</sup> and S-Blue: 38.7 mg g <sup>-1</sup>                           | (Ekici et al., 2011)       |
| 6.      | Hydrogel from polyvinyl alcohol and poly (acrylic acid-co-hydroxyethylmethacrylate) copolymer                | Semi IPN and Full IPN | Maximum adsorption capacity for Rhodamine B: 2.9 mg g <sup>-1</sup> , Methyl violet: 3.7 mg g <sup>-1</sup> | (Mandal et al., 2012)      |
| 7.      | Hydrogels of PEG and (AAm/SMA) copolymer of acrylamide/sodium methacrylate                                   | Semi IPN              | Janus Green B dye: Removal 90%                                                                              | (Üzüm & Karadağ, 2012)     |
| 8.      | Polymethacrylic acid grafted cellulose–bentonite (PMAA-g-                                                    | Full IPN              | MB: removal 99.9%                                                                                           | (Anirudhan & Tharun, 2012) |

|     |                                                                                                 |                   |                                                                                                                                                                          |                                |
|-----|-------------------------------------------------------------------------------------------------|-------------------|--------------------------------------------------------------------------------------------------------------------------------------------------------------------------|--------------------------------|
|     | Cell/Bent) IPN                                                                                  |                   |                                                                                                                                                                          |                                |
| 9.  | Hhydrogels from PEG (polyethylene glycol) and Aam (acrylamide)                                  | Semi IPN          | Adsorption capacities of acid red 17: 342.54 mg g <sup>-1</sup> , acid orange 7: 221.1 mg g <sup>-1</sup> and methyl orange: 185.24 mg g <sup>-1</sup>                   | (S. Zhao et al., 2012)         |
| 10. | Hydrogels based on polyacrylamide and chitosan                                                  | Semi and Full IPN | High anionic dye adsorption capacity of direct blue 1: 2.804 mg g <sup>-1</sup> by semi IPN and high cationic dye adsorption of MB: 6.744 mg g <sup>-1</sup> by full IPN | (Dragan et al., 2012)          |
| 11. | Carboxymethylcellulose/ poly(acrylamide-co-hydroxyethyl methacrylate) hydrogel                  | Semi IPN          | Maximum adsorption capacity of Methyl violet (MV): 450 mg g <sup>-1</sup> , Basic Fuchsin: 350 mg g <sup>-1</sup>                                                        | (Bhattacharyya & Ray, 2013)    |
| 12. | Poly(acrylamide-aniline)-grafted gum ghatti based crosslinked conducting hydrogel               | Semi IPN          | MG dye removal 98% after 20 hrs of operation                                                                                                                             | (K. Sharma et al., 2013)       |
| 13. | Full IPN of polymethacrylic acid and chitosan                                                   | Full IPN          | MV: 91% and CR: 82% removal                                                                                                                                              | (Maity & Ray, 2014)            |
| 14. | Poly(ether amine) (hPEA)/Poly(vinyl alcohol) (PVA) hyperbranched Interpenetrating Network (IPN) | Full IPN          | Fluorescein dyes: Removal 90%                                                                                                                                            | (P. Zhang et al., 2014)        |
| 15. | Semi-interpenetrating polymer network sodium alginate and isopropyl acrylamide                  | Semi IPN          | 600 mg g <sup>-1</sup> adsorption of RB 4 (Reactive Blue) dye                                                                                                            | (Dhanapal & Subramanian, 2014) |

|     |                                                                                                                                        |                   |                                                                         |                                  |
|-----|----------------------------------------------------------------------------------------------------------------------------------------|-------------------|-------------------------------------------------------------------------|----------------------------------|
| 16. | IPN hydrogel from acrylic copolymer and chitosan                                                                                       | Full IPN          | 98% CR and 94% MV dye removal                                           | (Mandal & Ray, 2014)             |
| 17. | P(NIPAM-MBAM) hydrogel microspheres (poly(N-isopropylacrylamide) (PNIPAM) and poly(methacrylic acid))                                  | Full IPN          | 3.7 mg g <sup>-1</sup> Magenta and 0.7 mg g <sup>-1</sup> CR adsorption | (Ahmad et al., 2014)             |
| 18. | Semi IPN hydrogels from GEL (gelatin) and/or PEG (poly (ethylene glycol)) with AAm (acrylamide) and 4-styrenesulfonic acid sodium salt | Semi IPN          | 93.34% MV dye adsorption percentage                                     | (Kundakci & Karadağ, 2014)       |
| 19. | TiO <sub>2</sub> nanoparticle immobilized Sodium alginate-polymethacrylic acid hydrogel                                                | Semi IPN          | MB: Removal 93%                                                         | (Lučić Škorić et al., 2015)      |
| 20. | Acrylic acid-2-hydroxyethyl methacrylate IPN hydrogels                                                                                 | Semi and Full IPN | >99% MV and >93% removal of MV and Fuchsine dye                         | (Bera et al., 2015)              |
| 21. | In-situ crosslinked PES (polyethersulfone) and modified chitosan hydrogel adsorbent                                                    | Semi IPN          | CR dye: Removal 80%                                                     | (R. Wang et al., 2015)           |
| 22. | Guar gum/acrylic acid hydrogel (Ggum-cl-poly(AA-ipn-aniline)) IPN                                                                      | Semi IPN          | MB: Nearly 94% and demonstrated antibacterial activity                  | (R. Sharma, Kaith, et al., 2015) |
| 23. | Chitosan/gelatin porous materials                                                                                                      | Full IPN          | Acid orange II maximum adsorption capacity 573 mg g <sup>-1</sup>       | (Cui et al., 2015)               |

|     |                                                                                           |                |                                                                                                                                          |                                  |
|-----|-------------------------------------------------------------------------------------------|----------------|------------------------------------------------------------------------------------------------------------------------------------------|----------------------------------|
| 24. | Ggum-cl-poly(IA) crosslinked hydrogel (itaconic acid and Guaran polysaccharide)           | Semi IPN       | Removal 84.5% and 81% of MB dye in neutral and acidic pH, respectively                                                                   | (R. Sharma, Kalia, et al., 2015) |
| 25. | IPN hydrogels based on chitosan (CS) and poly(acrylic acid) (PAA)                         | Semi IPN       | Adsorption capacity of basic BB12 (Nil Blue) dye: 430 mg g <sup>-1</sup>                                                                 | (J. Wang & Li, 2015)             |
| 26. | Semi IPN hydrogel from chitosan and starch                                                | Semi IPN       | Adsorption capacity of DR 80 dye: 312.77 mg g <sup>-1</sup>                                                                              | (Ngwabebhoh et al., 2016)        |
| 27. | Porous chitosan/hydroxyapatite composite membrane                                         | Sequential IPN | DB (direct black): Removal 98%                                                                                                           | (Shi et al., 2017)               |
| 28. | Guar gum-g-(acrylic acid-co-acrylamide-co-3-acrylamido propanoic acid) hydrogel           | Full IPN       | Maximum adsorption of MB: 27.06 mg g <sup>-1</sup> and SF (safranin F) dye: 39.35 mg g <sup>-1</sup> , and effective heavy metal removal | (Singha et al., 2017)            |
| 29. | Xanthan gum, PVA and tartaric acid-based semi IPN hydrogel                                | Semi IPN       | RB: 70% and AO (auramine-O): 63% removal                                                                                                 | (Sukriti et al., 2017)           |
| 30. | Aloe vera–acrylic acid-co-acrylamide                                                      | Semi IPN       | Malachite green (MG): Removal 94%                                                                                                        | (Saruchi et al., 2018)           |
| 31. | Av-cl-poly(AA-ipn-AAm) (aloe vera, acrylic acid, acrylamide IPN) microwave assisted       | Semi IPN       | MG: Removal 97.3%                                                                                                                        | (V. Kumar et al., 2018)          |
| 32. | Poly(acrylic acid)/poly(vinyl alcohol)/yeast superabsorbent polymers (PAA/PVA/yeast SAPs) | Semi IPN       | Maximum adsorption capacity of 50 mg g <sup>-1</sup> for MB                                                                              | (Feng et al., 2018)              |

|     |                                                                                                                 |            |                                                                                 |                             |
|-----|-----------------------------------------------------------------------------------------------------------------|------------|---------------------------------------------------------------------------------|-----------------------------|
| 33. | Hydrogel from (gum copal alcohols-collagen)-co-poly(acrylamide) and acrylic acid                                | Full IPN   | Adsorption capacity of MB: 1.7 mg g <sup>-1</sup>                               | (Kaur & Jindal, 2018)       |
| 34. | Hydrogel based on gum copal-collagen (GcA-coll)                                                                 | Full IPN   | MG (Malachite Green) dye: removal 88%                                           | (Kaur et al., 2018)         |
| 35. | QPVA (quartarnized PVA)/acrylamide full IPN alkaline membranes                                                  | Full IPN   | CR removal better than RB in binary dye systems and single system               | (J. Wang et al., 2018)      |
| 36. | PVA/CNC (cellulose nanocrystal)/polyHEMA hydrogels                                                              | Full IPN   | MB: 91% and (xylenol orange) XO: 93% removal                                    | (Bai et al., 2018)          |
| 37. | Cellulose filament/poly(NIPAM-co-AAc) hybrid hydrogels                                                          | Semi IPN   | MV dye: Removal 226.02 mg g <sup>-1</sup>                                       | (M. Zhang et al., 2018)     |
| 38. | Gum acacia/sodium alginate hydrogel                                                                             | Semi IPN   | MG dye: removal 95.39%, CV (crystal violet): 94.56% and AO (auramine-O): 97.49% | (A. K. Sharma et al., 2019) |
| 39. | N,N,N-trimethyl chitosan (TMC) and xanthan gum (XG) hydrogel                                                    | Full IPN   | CV dye: removal 94.4 % with antibacterial activity                              | (Abu Elella et al., 2019)   |
| 40. | Sodium humate/poly(acrylamide-co-methacrylic acid)/kaolin semi-interpenetrating polymer network hybrid hydrogel | Hybrid IPN | Adsorption of MB dye: 833.33 mg g <sup>-1</sup>                                 | (Yilmaz et al., 2019)       |
| 41. | Carboxymethyl cellulose/poly(acrylic acid) interpenetrating polymer network hydrogels                           | Full IPN   | Adsorption of MB dye: 613 mg g <sup>-1</sup>                                    | (Toledo et al., 2019)       |

|     |                                                                                                                                                                                |            |                                                                                                          |                          |
|-----|--------------------------------------------------------------------------------------------------------------------------------------------------------------------------------|------------|----------------------------------------------------------------------------------------------------------|--------------------------|
| 42. | PAA-XG-GO Semi IPN nanocomposite (cross-linked poly acrylic acid/xanthan gum/graphene oxide)                                                                                   | Semi IPN   | MB: Removal 88.5% and swelling upto 485%                                                                 | (Hosseini et al., 2020)  |
| 43. | Graphene oxide decorated superporous polyacrylamide hydrogel (MCC/poly (AAM-co-NaAc)/r-GO (L))                                                                                 | Full IPN   | MB: 98% and RB: 97.6% removed                                                                            | (Sarkar et al., 2020)    |
| 44. | PVA/KHA/GG Hydrogel (polyvinyl alcohol/potassium humate/guar gum)                                                                                                              | Semi IPN   | Maximum adsorption capacity for MB dye: 1166.73 mg g <sup>-1</sup> and Pb(II): 625.21 mg g <sup>-1</sup> | (Niu et al., 2020)       |
| 45. | Cassava starch-graft-poly(acrylamide) hydrogel                                                                                                                                 | Full IPN   | >85% of MB removal within less than 10 hrs                                                               | (Junlapong et al., 2020) |
| 46. | Copolymer poly(di(ethylene glycol) methyl ether methacrylate-co-poly(ethylene glycol) methyl ether methacrylate) (P(MEO2MA-co-OEGMA300)) in alginate-Ca <sup>2+</sup> hydrogel | Hybrid IPN | MB: Removal 96%                                                                                          | (N. Hu et al., 2020)     |
| 47. | Poly(vinyl alcohol-g-acrylamide)/SiO <sub>2</sub> @ZnO photocatalytic hydrogel composite                                                                                       | Semi IPN   | Maximum adsorption capacity for MB: 757 mg g <sup>-1</sup>                                               | (Maijan et al., 2020)    |
| 48. | Starch-grafted poly(N,N-dimethyl acrylamide) hydrogel                                                                                                                          | Full IPN   | Acid Red 8: removal 91%                                                                                  | (Sadik et al., 2020)     |
| 49. | Self-supported gel filter membrane with Ca <sup>2+</sup> alginate network and covalently crosslinked                                                                           | Full IPN   | MB: removal 93% and DR: removal 95%                                                                      | (J. Hu et al., 2020)     |



|     |                                                                                                         |                             |                                                                               |                           |
|-----|---------------------------------------------------------------------------------------------------------|-----------------------------|-------------------------------------------------------------------------------|---------------------------|
|     | polyacrylamide network                                                                                  |                             |                                                                               |                           |
| 50. | Polyvinyl Alcohol–Alginate/Bentonite Semi-Interpenetrating Polymer Network Nanocomposite Hydrogel Beads | Semi IPN                    | Maximum adsorption capacity of MB: 51.34 mg g <sup>-1</sup>                   | (Aljar et al., 2021)      |
| 51. | KG-GI-PVA Semi IPN Microspheres (katira gum/polyvinyl alcohol)                                          | Semi IPN                    | 96.92% of Bismark brown-yellow dye removal                                    | (A. Kumar et al., 2021)   |
| 52. | Solid state liquid crystal shell IPN                                                                    | IPN via microfluidic method | MB and AR37: Removal 99%                                                      | (Gwon & Park, 2021)       |
| 53. | Hydroxyl-terminated polybutadiene (HTPB) and multifunctional isocyanate (MFI) membrane                  | Semi IPN                    | MB and MO dye removal 98%                                                     | (Nozad et al., 2022)      |
| 54. | PVDF/PDA IPN membrane                                                                                   | Sequential IPN              | >97% removal of MB and CR dyes                                                | (Sen Gupta et al., 2022)  |
| 55. | Pullulan/PDA Semi IPN hydrogels (sPDA)                                                                  | Semi IPN                    | Maximum adsorption capacity of 107 mg g <sup>-1</sup> for Crystal violet (CV) | (Wu et al., 2022)         |
| 56. | Poly(vinyl alcohol)/partially hydrolyzed polyacrylamide/graphene oxide Semi IPN nanocomposite hydrogel  | Semi IPN                    | Maximum adsorption capacity of 714.8 mg g <sup>-1</sup> at 30°C for MB dye    | (Rahmatpour et al., 2022) |
| 57. | TFC semi IPN membrane from 3, 5-diaminobenzoic acid (DABA) and piperazine (PIP)                         | Semi IPN                    | MB: removal 99%                                                               | (Waheed et al., 2022)     |

|     |                                                                                                                         |                                  |                                                                                            |                                     |
|-----|-------------------------------------------------------------------------------------------------------------------------|----------------------------------|--------------------------------------------------------------------------------------------|-------------------------------------|
| 58. | PVDF-Pd (palladium)/<br>Semi IPN composite<br>membrane                                                                  | Semi IPN                         | CR and DB dyes<br>removal >99%                                                             | (Zhai et al.,<br>2022)              |
| 59. | Semi-interpenetrating<br>network based on<br>xanthan gum-cl-2-(N-<br>morpholinoethyl<br>methacrylate)/titanium<br>oxide | Semi IPN                         | Adsorption capacity of<br>MB: 63.34 mg g <sup>-1</sup> and<br>CV: 83.25 mg g <sup>-1</sup> | (Taktak &<br>Özyaranlar,<br>2022)   |
| 60. | Semi IPN hydrogels<br>based on acrylamide<br>(AAM) and itaconic acid<br>(ITA)                                           | Semi IPN                         | Adsorption capacity of<br>MB: 15 mg g <sup>-1</sup> and MG:<br>8 mg g <sup>-1</sup>        | (Ciftbudak &<br>Orakdogan,<br>2022) |
| 61. | Poly(N-<br>isopropylacrylamide-co-<br>methacrylic acid)<br>P(NIPA-MA) gels                                              | Semi IPN                         | MV(methyl violet):<br>removal 75%                                                          | (Kalkan &<br>Orakdogan,<br>2022)    |
| 62. | Chitosan- and Alginate-<br>Based Hydrogels                                                                              | Semi IPN                         | MB dye removal 96%<br>within 10 mins                                                       | (ALSamman &<br>Sánchez, 2022)       |
| 63. | Cellulose acetate/acrylic<br>acid-glutaraldehyde<br>semi-interpenetrating<br>networks                                   | Semi IPN                         | MB: removal 90%                                                                            | (Rana et al.,<br>2022)              |
| 64. | Methylcellulose/tannic<br>acid complex particles<br>coated on alginate<br>hydrogel scaffold                             | IPN via<br>Pickering<br>emulsion | MB dye adsorption:<br>791.17 mg g <sup>-1</sup>                                            | (Abebe & Kim,<br>2022)              |

Table S3: Miscellaneous water remediation application using IPNs based material

| Sl. No | IPN system                                                                                      | Types of IPN | Miscellaneous application in water remediation and remarks                                                                                                                    | References                    |
|--------|-------------------------------------------------------------------------------------------------|--------------|-------------------------------------------------------------------------------------------------------------------------------------------------------------------------------|-------------------------------|
| 1      | Sodium alginate/acrylamide) based IPN                                                           | Semi IPN     | Detection of Ni <sup>2+</sup> , Cd <sup>2+</sup> , and Pb <sup>2+</sup>                                                                                                       | (Şolpan & Torun, 2005)        |
| 2      | Starch/acryl amide-based hydrogels                                                              | Full IPN     | adsorption of heavy metal ions like Cu <sup>2+</sup> and Ni <sup>2+</sup> adsorption                                                                                          | (Peñaranda A. & Sabino, 2010) |
| 3      | Poly(polyethylene glycol diacrylate) poly(PEGDA) and poly(methacrylic acid) (PMAA) IPN hydrogel | Full IPN     | Cu(II), Cd(II), or Pb(II) ion solutions                                                                                                                                       | (J. Wang et al., 2011)        |
| 4      | Polyvinyl alcohol/poly (acrylic acid-co-acrylic amide) (PVA-P(AA-co-AM)) hydrogels              | Semi IPN     | Cobalt (II) adsorption                                                                                                                                                        | (X. Wang et al., 2016)        |
| 5      | IPN of acrylamide (AAm) and 1,4-butanediol vinyl ether (BVE)                                    | Full IPN     | Adsorption and determination of Cu <sup>2+</sup> , Ni <sup>2+</sup> and Zn <sup>2+</sup> ions                                                                                 | (J. Wang et al., 2016)        |
| 6      | 2-hydroxyethyl methacrylate (HEMA), acrylamide (AM), polyvinyl alcohol (PVA) and chitosan (CS)  | Full IPN     | Excellent antibacterial activity against <i>E. coli</i>                                                                                                                       | (Panpinit et al., 2020)       |
| 7      | interpenetrating polymeric networks (IPN) based on sodium alginate, carrageenan and bentonite   | Full IPN     | Excellent adsorption efficiency of methylene blue, Fe <sup>3+</sup> , Ni <sup>2+</sup> , and Cr <sup>3+</sup> ions is 1271, 1550, 1500 and 1540 mg/g adsorbent, respectively. | (Al-Sakkari et al., 2020)     |
| 8      | Chitosan/polyacrylamide IPN modified with $\alpha$ -ketoglutaric acid                           | Semi IPN     | More than 90% selective adsorption for Cu(II), Pb(II), and Zn(II) in a mixture of heavy metal ions upto five adsorption-desorption cycles                                     | (Z. Zhao et al., 2021)        |

|    |                                                                                                       |          |                                                                                                           |                        |
|----|-------------------------------------------------------------------------------------------------------|----------|-----------------------------------------------------------------------------------------------------------|------------------------|
| 9  | Poly(2-hydroxyethyl methacrylate-co-acrylamide)/poly(vinyl alcohol) (P(HEMA-co-AM)/PVA) IPN hydrogels | Full IPN | Cu(II) and Pb(II) ions adsorption                                                                         | (Tanan et al., 2021)   |
| 10 | Chitosan/gelatin-based IPN incorporated with melanin-coated titania hollow nanospheres (CG@MPT-h)     | Full IPN | Solar-Driven Wastewater Treatment                                                                         | (X. Wang et al., 2021) |
| 11 | Cellulose Nanofibril/Chitosan IPN hydrogel crosslinked by Fluorescent carbon dots hydrogel            | Full IPN | Simultaneously detection and adsorbent of Cu(II) and Cr(VI) in water.                                     | (Chen et al., 2022)    |
| 12 | Thermo-responsive Semi IPN/PVDF@Pd bilayer composite membrane                                         | Semi IPN | Water flux $27.0 \text{ L m}^{-2} \text{ h}^{-1} \text{ bar}^{-1}$ and 99.74% adsorption of p-nitrophenol | (S. Wang et al., 2022) |

## References

Abebe, M. W., & Kim, H. (2022). Methylcellulose/tannic acid complex particles coated on alginate hydrogel scaffold via Pickering for removal of methylene blue from aqueous and quinoline

- from non-aqueous media. *Chemosphere*, 286, 131597. <https://doi.org/10.1016/j.chemosphere.2021.131597>
- Abu Elella, M. H., ElHafeez, E. A., Goda, E. S., Lee, S., & Yoon, K. R. (2019). Smart bactericidal filter containing biodegradable polymers for crystal violet dye adsorption. *Cellulose*, 26(17), 9179–9206. <https://doi.org/10.1007/s10570-019-02698-1>
- Ahmad, H., Nurunnabi, M., Rahman, M. M., Kumar, K., Tauer, K., Minami, H., & Gafur, M. A. (2014). Magnetically doped multi stimuli-responsive hydrogel microspheres with IPN structure and application in dye removal. *Colloids and Surfaces A: Physicochemical and Engineering Aspects*, 459, 39–47. <https://doi.org/10.1016/j.colsurfa.2014.06.038>
- Aljar, M. A. A., Rashdan, S., & Abd El-Fattah, A. (2021). Environmentally Friendly Polyvinyl Alcohol–Alginate/Bentonite Semi-Interpenetrating Polymer Network Nanocomposite Hydrogel Beads as an Efficient Adsorbent for the Removal of Methylene Blue from Aqueous Solution. *Polymers*, 13(22), 4000. <https://doi.org/10.3390/polym13224000>
- Al-Sakkari, E. G., Abdeldayem, O. M., Genina, E. E., Amin, L., Bahgat, N. T., Rene, E. R., & El-Sherbiny, I. M. (2020). New alginate-based interpenetrating polymer networks for water treatment: A response surface methodology based optimization study. *International Journal of Biological Macromolecules*, 155, 772–785. <https://doi.org/10.1016/j.ijbiomac.2020.03.220>
- ALSamman, M. T., & Sánchez, J. (2022). Chitosan- and Alginate-Based Hydrogels for the Adsorption of Anionic and Cationic Dyes from Water. *Polymers*, 14(8), 1498. <https://doi.org/10.3390/polym14081498>
- Anirudhan, T. S., & Tharun, A. R. (2012). Preparation and adsorption properties of a novel interpenetrating polymer network (IPN) containing carboxyl groups for basic dye from aqueous media. *Chemical Engineering Journal*, 181–182, 761–769. <https://doi.org/10.1016/j.cej.2011.11.077>
- Bai, H., Li, Z., Zhang, S., Wang, W., & Dong, W. (2018). Interpenetrating polymer networks in polyvinyl alcohol/cellulose nanocrystals hydrogels to develop absorbent materials. *Carbohydrate Polymers*, 200, 468–476. <https://doi.org/10.1016/j.carbpol.2018.08.041>
- Bera, R., Dey, A., Datta sarma, A., & Chakrabarty, D. (2015). Synthesis and characterization of acrylic acid-2-hydroxyethyl methacrylate IPN hydrogels. *RSC Advances*, 5(93), 75870–75880. <https://doi.org/10.1039/C5RA12110H>
- Bhattacharyya, R., & Ray, S. K. (2013). Kinetic and equilibrium modeling for adsorption of textile dyes in aqueous solutions by carboxymethyl cellulose/poly(acrylamide- co -hydroxyethyl methacrylate) semi-interpenetrating network hydrogel. *Polymer Engineering & Science*, 53(11), 2439–2453. <https://doi.org/10.1002/pen.23501>
- Cai, Y., Shen, W., Loo, S. L., Krantz, W. B., Wang, R., Fane, A. G., & Hu, X. (2013). Towards temperature driven forward osmosis desalination using Semi IPN hydrogels as reversible draw agents. *Water Research*, 47(11), 3773–3781. <https://doi.org/10.1016/j.watres.2013.04.034>
- Chanda, M., Pillay, S. A., Sarkar, A., & Modak, J. M. (2010). Interpenetrating Networks of Cross-Linked Poly(acrylic acid) and Cross-linked Polyethyleneimine (80% Ethoxylated) for Desalination of Brackish Water by Thermoreversible Sorption. *Industrial & Engineering Chemistry Research*, 49(16), 7136–7146. <https://doi.org/10.1021/ie100342r>
- Chen, X., Song, Z., Yuan, B., Li, X., Li, S., Thang Nguyen, T., Guo, M., & Guo, Z. (2022). Fluorescent carbon dots crosslinked cellulose Nanofibril/Chitosan interpenetrating hydrogel system for sensitive detection and efficient adsorption of Cu (II) and Cr (VI). *Chemical Engineering Journal*, 430, 133154. <https://doi.org/10.1016/j.cej.2021.133154>
- Ciftbudak, S., & Orakdogan, N. (2022). Assessing the compressive elasticity and multi-responsive property of gelatin-containing weakly anionic copolymer gels via Semi IPN strategy. *Soft Matter*, 18(37), 7181–7200. <https://doi.org/10.1039/D2SM00938B>
- Cui, L., Xiong, Z., Guo, Y., Liu, Y., Zhao, J., Zhang, C., & Zhu, P. (2015). Fabrication of interpenetrating polymer network chitosan/gelatin porous materials and study on dye adsorption properties. *Carbohydrate Polymers*, 132, 330–337. <https://doi.org/10.1016/j.carbpol.2015.06.017>
- Dhanapal, V., & Subramanian, K. (2014). Recycling of reactive dye using semi-interpenetrating polymer network from sodium alginate and isopropyl acrylamide. *Journal of Applied Polymer Science*, 131(21). <https://doi.org/10.1002/app.40968>

- Dragan, E. S., Perju, M. M., & Dinu, M. V. (2012). Preparation and characterization of IPN composite hydrogels based on polyacrylamide and chitosan and their interaction with ionic dyes. *Carbohydrate Polymers*, 88(1), 270–281. <https://doi.org/10.1016/j.carbpol.2011.12.002>
- Ekici, S., Güntekin, G., & Saraydin, D. (2011). The Removal of Textile Dyes with Cross-Linked Chitosan-Poly(acrylamide) Adsorbent Hydrogels. *Polymer - Plastics Technology and Engineering*, 50(12), 1247–1255. <https://doi.org/10.1080/03602559.2011.574674>
- Feng, D., Bai, B., Wang, H., & Suo, Y. (2018). Novel Fabrication of PAA/PVA/Yeast Superabsorbent with Interpenetrating Polymer Network for pH-Dependent Selective Adsorption of Dyes. *Journal of Polymers and the Environment*, 26(2), 567–588. <https://doi.org/10.1007/s10924-017-0972-y>
- Gwon, S., & Park, S. (2021). Preparation of uniformly sized interpenetrating polymer network polyelectrolyte hydrogel droplets from a solid-state liquid crystal shell. *Journal of Industrial and Engineering Chemistry*, 99, 235–245. <https://doi.org/10.1016/j.jiec.2021.04.032>
- Hosseini, S. M., Shahrousvand, M., Shojaei, S., Khonakdar, H. A., Asefnejad, A., & Goodarzi, V. (2020). Preparation of superabsorbent eco-friendly semi-interpenetrating network based on cross-linked poly acrylic acid/xanthan gum/graphene oxide (PAA/XG/GO): Characterization and dye removal ability. *International Journal of Biological Macromolecules*, 152, 884–893. <https://doi.org/10.1016/j.ijbiomac.2020.02.082>
- Hu, J., Chen, Y., Lu, J., Fan, X., Li, J., Li, Z., Zeng, G., & Liu, W. (2020). A self-supported gel filter membrane for dye removal with high anti-fouling and water flux performance. *Polymer*, 201, 122531. <https://doi.org/10.1016/j.polymer.2020.122531>
- Hu, N., Chen, C., Tan, J., Wang, W., Wang, C., Fan, H., Wang, J., Müller-Buschbaum, P., & Zhong, Q. (2020). Enhanced Adsorption of Methylene Blue Triggered by the Phase Transition of Thermoresponsive Polymers in Hybrid Interpenetrating Polymer Network Hydrogels. *ACS Applied Polymer Materials*, 2(8), 3674–3684. <https://doi.org/10.1021/acsapm.0c00661>
- Junlapong, K., Maijan, P., Chaibundit, C., & Chantarak, S. (2020). Effective adsorption of methylene blue by biodegradable superabsorbent cassava starch-based hydrogel. *International Journal of Biological Macromolecules*, 158, 258–264. <https://doi.org/10.1016/j.ijbiomac.2020.04.247>
- Kalkan, B., & Orakdogan, N. (2022). Strength and salt/pH dependent-sorption capacity modulation of N-(alkyl)acrylamide-based Semi IPN hybrid gels reinforced with silica nanoparticles. *European Polymer Journal*, 173, 111296. <https://doi.org/10.1016/j.eurpolymj.2022.111296>
- Kaur, S., & Jindal, R. (2018). Synthesis of interpenetrating network hydrogel from (gum copal alcohols-collagen)-co-poly(acrylamide) and acrylic acid: Isotherms and kinetics study for removal of methylene blue dye from aqueous solution. *Materials Chemistry and Physics*, 220, 75–86. <https://doi.org/10.1016/j.matchemphys.2018.08.008>
- Kaur, S., Jindal, R., & Kaur Bhatia, J. (2018). Synthesis and RSM-CCD optimization of microwave-induced green interpenetrating network hydrogel adsorbent based on gum copal for selective removal of malachite green from waste water. *Polymer Engineering and Science*, 58(12), 2293–2303. <https://doi.org/10.1002/pen.24851>
- Kumar, A., Goel, A., & others. (2021). KG-GI-PVA Semi IPN Microspheres: Synthesis, Characterisation, BBY Adsorption And Potential Applications. *NVEO-NATURAL VOLATILES & ESSENTIAL OILS Journal* | NVEO, 10124–10153.
- Kumar, V., Rehani, V., Kaith, B. S., & Saruchi, S. (2018). Synthesis of a biodegradable interpenetrating polymer network of Av-cl-poly(AA-ipn-AAm) for malachite green dye removal: Kinetics and thermodynamic studies. *RSC Advances*, 8(73), 41920–41937. <https://doi.org/10.1039/C8RA07759B>
- Kundakci, S., & Karadağ, E. (2014). Preliminary swelling and dye sorption studies of acrylamide/4-styrenesulfonic acid sodium salt copolymers and semi-interpenetrating polymer networks composed of gelatin and/or PEG. *Polymer Bulletin*, 71(2), 351–370. <https://doi.org/10.1007/s00289-013-1065-2>
- Kusuktham, B. (2006). Preparation of interpenetrating polymer network gel beads for dye absorption. *Journal of Applied Polymer Science*, 102(2), 1585–1591. <https://doi.org/10.1002/app.23882>
- Lee, S. J., Lim, H. W., & Park, S. H. (2021). Adsorptive seawater desalination using MOF-incorporated Cu-alginate/PVA beads: Ion removal efficiency and durability. *Chemosphere*, 268, 128797. <https://doi.org/10.1016/j.chemosphere.2020.128797>

- Lei, Y., Luo, Y., Chen, F., & Mei, L. (2014). Sulfonation Process and Desalination Effect of Polystyrene/PVDF Semi-Interpenetrating Polymer Network Cation Exchange Membrane. *Polymers*, *6*(7), 1914–1928. <https://doi.org/10.3390/polym6071914>
- Liao, W., Gao, S., Xie, X., & Xu, M. (2010). Macroporous crosslinked hydrophobic/hydrophilic polystyrene/polyamide interpenetrating polymer network: Synthesis, characterization, and adsorption behaviors for quercetin from aqueous solution. *Journal of Applied Polymer Science*, *118*(6), 3643–3648. <https://doi.org/10.1002/app.32479>
- Lučić Škorić, M., Milosavljević, N., Radetić, M., Šaponjić, Z., Radoičić, M., & Kalagasidis Krušić, M. (2015). Synthesis and characterization of interpenetrating polymer network based on sodium alginate and methacrylic acid and potential application for immobilization of TiO<sub>2</sub> nanoparticles. *Polymer Engineering & Science*, *55*(11), 2511–2518. <https://doi.org/10.1002/pen.24141>
- Maijan, P., Amornpitoksuk, P., & Chantarak, S. (2020). Synthesis and characterization of poly(vinyl alcohol-g-acrylamide)/SiO<sub>2</sub>@ZnO photocatalytic hydrogel composite for removal and degradation of methylene blue. *Polymer*, *203*, 122771. <https://doi.org/10.1016/j.polymer.2020.122771>
- Maity, J., & Ray, S. K. (2014). Enhanced adsorption of methyl violet and congo red by using semi and full IPN of polymethacrylic acid and chitosan. *Carbohydrate Polymers*, *104*, 8–16. <https://doi.org/10.1016/j.carbpol.2013.12.086>
- Mandal, B., & Ray, S. K. (2014). Swelling, diffusion, network parameters and adsorption properties of IPN hydrogel of chitosan and acrylic copolymer. *Materials Science and Engineering: C*, *44*, 132–143. <https://doi.org/10.1016/j.msec.2014.08.021>
- Mandal, B., Ray, S. K., & Bhattacharyya, R. (2012). Synthesis of full and semi Interpenetrating hydrogel from polyvinyl alcohol and poly (acrylic acid-co-hydroxyethylmethacrylate) copolymer: Study of swelling behavior, network parameters, and dye uptake properties. *Journal of Applied Polymer Science*, *124*(3), 2250–2268. <https://doi.org/10.1002/app.35298>
- Ngwabebhoh, F. A., Gazi, M., & Oladipo, A. A. (2016). Adsorptive removal of multi-azo dye from aqueous phase using a Semi IPN superabsorbent chitosan-starch hydrogel. *Chemical Engineering Research and Design*, *112*, 274–288. <https://doi.org/10.1016/j.cherd.2016.06.023>
- Niu, Y., Han, X., Huang, L., & Song, J. (2020). Methylene Blue and Lead(II) Removal via Degradable Interpenetrating Network Hydrogels. *Journal of Chemical & Engineering Data*, *65*(4), 1954–1967. <https://doi.org/10.1021/acs.jced.9b01134>
- Nozad, E., Poursattar Marjani, A., & Mahmoudian, M. (2022). A novel and facile Semi IPN system in fabrication of solvent resistant nano-filtration membranes for effective separation of dye contamination in water and organic solvents. *Separation and Purification Technology*, *282*, 120121. <https://doi.org/10.1016/j.seppur.2021.120121>
- Panpinit, S., Pongsomboon, S., Keawin, T., & Saengsuwan, S. (2020). Development of multicomponent interpenetrating polymer network (IPN) hydrogel films based on 2-hydroxyethyl methacrylate (HEMA), acrylamide (AM), polyvinyl alcohol (PVA) and chitosan (CS) with enhanced mechanical strengths, water swelling and antibacterial properties. *Reactive and Functional Polymers*, *156*, 104739. <https://doi.org/10.1016/j.reactfunctpolym.2020.104739>
- Peñaranda A., J. E., & Sabino, M. A. (2010). Effect of the presence of lignin or peat in IPN hydrogels on the sorption of heavy metals. *Polymer Bulletin*, *65*(5), 495–508. <https://doi.org/10.1007/s00289-010-0264-3>
- Qu, Z.-T., Duan, S.-Y., Li, B.-B., Sun, D., & Gu, Y.-L. (2018). PDMS/PVDF microporous membrane with semi-interpenetrating polymer networks for vacuum membrane distillation. *Journal of Applied Polymer Science*, *135*(8), 45792. <https://doi.org/10.1002/app.45792>
- Rahmatpour, A., Soleimani, P., & Mirkani, A. (2022). Eco-friendly poly(vinyl alcohol)/partially hydrolyzed polyacrylamide/graphene oxide Semi IPN nanocomposite hydrogel as a reusable and efficient adsorbent of cationic dye methylene blue from water. *Reactive and Functional Polymers*, *175*, 105290. <https://doi.org/10.1016/j.reactfunctpolym.2022.105290>
- Rajput, A., Yadav, V., Sharma, P. P., & Kulshrestha, V. (2018). Synthesis of SGO composite interpenetrating network (CIPN) cation exchange membranes: Stability and salt removal efficiency. *Journal of Membrane Science*, *564*, 44–52. <https://doi.org/10.1016/j.memsci.2018.07.004>

- Rana, J., Goindi, G., & Kaur, N. (2022). Potential prospects of cellulose acetate/acrylic acid-glutaraldehyde semi-interpenetrating networks to remove methylene blue dye from wastewater. *Materials Today: Proceedings*, S2214785322052944. <https://doi.org/10.1016/j.matpr.2022.08.127>
- Sadik, W. A.-A., El-Demerdash, A.-G. M., Abbas, R., & Gabre, H. A. (2020). Fast synthesis of an eco-friendly starch-grafted poly(N,N-dimethyl acrylamide) hydrogel for the removal of Acid Red 8 dye from aqueous solutions. *Polymer Bulletin*, 77(8), 4445–4468. <https://doi.org/10.1007/s00289-019-02958-x>
- Sarkar, N., Sahoo, G., & Swain, S. K. (2020). Reduced graphene oxide decorated superporous polyacrylamide based interpenetrating network hydrogel as dye adsorbent. *Materials Chemistry and Physics*, 250, 123022. <https://doi.org/10.1016/j.matchemphys.2020.123022>
- Saruchi, Kumar, V., Rehani, V., & Kaith, B. S. (2018). Microwave-assisted synthesis of biodegradable interpenetrating polymer network of aloe vera–poly(acrylic acid-co-acrylamide) for removal of malachite green dye: Equilibrium, kinetics and thermodynamic studies. *Iranian Polymer Journal*, 27(11), 913–926. <https://doi.org/10.1007/s13726-018-0665-y>
- Sen Gupta, R., Padmavathy, N., Agarwal, P., & Bose, S. (2022). PH-triggered bio-inspired membranes engineered using sequential interpenetrating polymeric networks for tunable antibiotic and dye removal. *Chemical Engineering Journal*, 446. <https://doi.org/10.1016/j.cej.2022.136997>
- Sharma, A. K., Priya, Kaith, B. S., Sharma, N., Bhatia, J. K., Tanwar, V., Panchal, S., & Bajaj, S. (2019). Selective removal of cationic dyes using response surface methodology optimized gum acacia-sodium alginate blended superadsorbent. *International Journal of Biological Macromolecules*, 124, 331–345. <https://doi.org/10.1016/j.ijbiomac.2018.11.213>
- Sharma, K., Kaith, B. S., Kumar, V., Kumar, V., Som, S., Kalia, S., & Swart, H. C. (2013). Synthesis and properties of poly(acrylamide-aniline)-grafted gum ghatti based nanospikes. *RSC Advances*, 3(48), 25830. <https://doi.org/10.1039/c3ra44809f>
- Sharma, R., Kaith, B. S., Kalia, S., Pathania, D., Kumar, A., Sharma, N., Street, R. M., & Schauer, C. (2015). Biodegradable and conducting hydrogels based on Guar gum polysaccharide for antibacterial and dye removal applications. *Journal of Environmental Management*, 162, 37–45. <https://doi.org/10.1016/j.jenvman.2015.07.044>
- Sharma, R., Kalia, S., Kaith, B. S., Pathania, D., Kumar, A., & Thakur, P. (2015). Guaran-based biodegradable and conducting interpenetrating polymer network composite hydrogels for adsorptive removal of methylene blue dye. *Polymer Degradation and Stability*, 122, 52–65. <https://doi.org/10.1016/j.polymdegradstab.2015.10.015>
- Shi, C., Lv, C., Wu, L., & Hou, X. (2017). Porous chitosan/hydroxyapatite composite membrane for dyes static and dynamic removal from aqueous solution. *Journal of Hazardous Materials*, 338, 241–249. <https://doi.org/10.1016/j.jhazmat.2017.05.022>
- Singha, N. R., Mahapatra, M., Karmakar, M., Dutta, A., Mondal, H., & Chattopadhyay, P. K. (2017). Synthesis of guar gum- g -(acrylic acid- co -acrylamide- co -3-acrylamido propanoic acid) IPN via *in situ* attachment of acrylamido propanoic acid for analyzing superadsorption mechanism of Pb( II )/Cd( II )/Cu( II )/MB/MV. *Polymer Chemistry*, 8(44), 6750–6777. <https://doi.org/10.1039/C7PY01564J>
- Şolpan, D., & Torun, M. (2005). Investigation of complex formation between (sodium alginate/acrylamide) semi-interpenetrating polymer networks and lead, cadmium, nickel ions. *Colloids and Surfaces A: Physicochemical and Engineering Aspects*, 268(1–3), 12–18. <https://doi.org/10.1016/j.colsurfa.2005.04.035>
- Şolpan, D., Torun, M., & Güven, O. (2008). The usability of (sodium alginate/acrylamide) semi-interpenetrating polymer networks on removal of some textile dyes. *Journal of Applied Polymer Science*, 108(6), 3787–3795. <https://doi.org/10.1002/app.27945>
- Sukriti, Sharma, J., Chadha, A. S., Pruthi, V., Anand, P., Bhatia, J., & Kaith, B. S. (2017). Sequestration of dyes from artificially prepared textile effluent using RSM-CCD optimized hybrid backbone based adsorbent-kinetic and equilibrium studies. *Journal of Environmental Management*, 190, 176–187. <https://doi.org/10.1016/j.jenvman.2016.12.065>
- Sun, D., Zheng, Z.-S., Liu, M.-Q., Li, B.-B., Huang, F., & Li, D.-Y. (2017). Structuring and characterization of a novel microporous PVDF membrane with semi-interpenetrating polymer



- networks for vacuum membrane distillation. *Polymer Engineering & Science*, 57(12), 1311–1321. <https://doi.org/10.1002/pen.24514>
- Taktak, F. F., & Özyaranlar, E. (2022). Semi-interpenetrating network based on xanthan gum-cl-2-(N-morpholinoethyl methacrylate)/titanium oxide for the single and binary removal of cationic dyes from water. *International Journal of Biological Macromolecules*, 221, 238–255. <https://doi.org/10.1016/j.ijbiomac.2022.08.139>
- Tanan, W., Panpinit, S., & Saengsuwan, S. (2021). Comparison of microwave-assisted and thermal-heated synthesis of P(HEMA-co-AM)/PVA interpenetrating polymer network (IPN) hydrogels for Pb(II) removal from aqueous solution: Characterization, adsorption and kinetic study. *European Polymer Journal*, 143, 110193. <https://doi.org/10.1016/j.eurpolymj.2020.110193>
- Tian, E. L., Zhou, Huan., Ren, Y. W., mirza, Zakaria. a., Wang, X. Z., & Xiong, S. W. (2014). Novel design of hydrophobic/hydrophilic interpenetrating network composite nanofibers for the support layer of forward osmosis membrane. *Desalination*, 347, 207–214. <https://doi.org/10.1016/j.desal.2014.05.043>
- Toledo, P. V. O., Limeira, D. P. C., Siqueira, N. C., & Petri, D. F. S. (2019). Carboxymethyl cellulose/poly(acrylic acid) interpenetrating polymer network hydrogels as multifunctional adsorbents. *Cellulose*, 26(1), 597–615. <https://doi.org/10.1007/s10570-018-02232-9>
- Üzüm, Ö. B., & Karadağ, E. (2012). Behavior of semi IPN hydrogels composed of PEG and AAm/SMA copolymers in swelling and uptake of Janus Green B from aqueous solutions. *Journal of Applied Polymer Science*, 125(5), 3318–3328. <https://doi.org/10.1002/app.36586>
- Waheed, A., Baig, U., & Ansari, M. A. (2022). Fabrication of CuO nanoparticles immobilized nanofiltration composite membrane for dye/salt fractionation: Performance and antibiofouling. *Journal of Environmental Chemical Engineering*, 10(1), 106960. <https://doi.org/10.1016/j.jece.2021.106960>
- Wang, C., Wang, Z., Yang, F., & Wang, J. (2021). Improving the permselectivity and antifouling performance of reverse osmosis membrane based on a semi-interpenetrating polymer network. *Desalination*, 502, 114910. <https://doi.org/10.1016/j.desal.2020.114910>
- Wang, J., Han, Y., Zhao, G., & Chen, X. (2016). Ion-imprinted interpenetrating network gels for solid-phase extraction of heavy metal ions. *International Journal of Environmental Analytical Chemistry*, 96(14), 1341–1355. <https://doi.org/10.1080/03067319.2016.1251913>
- Wang, J., & Li, J. (2015). One-pot Synthesis of IPN Hydrogels with Enhanced Mechanical Strength for Synergistic Adsorption of Basic Dyes. *Soft Materials*, 13(3), 160–166. <https://doi.org/10.1080/1539445X.2015.1047957>
- Wang, J., Liu, F., & Wei, J. (2011). Enhanced adsorption properties of interpenetrating polymer network hydrogels for heavy metal ion removal. *Polymer Bulletin*, 67(8), 1709–1720. <https://doi.org/10.1007/s00289-011-0579-8>
- Wang, J., Zhang, Y., Wang, L., Feng, R., & Zhang, F. (2018). Competitive Adsorption removal of Congo red and Rhodamine B over alkaline membrane from in situ polymerization of Gemini cationic molecule. *Journal of the Iranian Chemical Society*, 15(1), 141–152. <https://doi.org/10.1007/s13738-017-1217-7>
- Wang, R., Jiang, X., He, A., Xiang, T., & Zhao, C. (2015). An in situ crosslinking approach towards chitosan-based Semi IPN hybrid particles for versatile adsorptions of toxins. *RSC Advances*, 5(64), 51631–51641. <https://doi.org/10.1039/C5RA04638F>
- Wang, S., Chen, X., Li, B., Shi, X., Shi, Y., Wang, J., Pan, J., & Wan, D. (2022). One-step selective separation and catalytic transformation of an organic pollutant from pollutant mixture via a thermo-responsive Semi IPN/PVDF@Pd bilayer composite membrane. *Separation and Purification Technology*, 286, 120493. <https://doi.org/10.1016/j.seppur.2022.120493>
- Wang, X., Hou, H., Li, Y., Wang, Y., Hao, C., & Ge, C. (2016). A novel Semi IPN hydrogel: Preparation, swelling properties and adsorption studies of Co (II). *Journal of Industrial and Engineering Chemistry*, 41, 82–90. <https://doi.org/10.1016/j.jiec.2016.07.012>
- Wang, X., Li, Z., Wu, Y., Guo, H., Zhang, X., Yang, Y., Mu, H., & Duan, J. (2021). Construction of a Three-Dimensional Interpenetrating Network Sponge for High-Efficiency and Cavity-Enhanced Solar-Driven Wastewater Treatment. *ACS Applied Materials & Interfaces*, 13(9), 10902–10915. <https://doi.org/10.1021/acsami.0c21690>

- Wu, L., Shi, M., Guo, R., & Dong, W. (2022). Development of a novel pullulan/polydopamine composite hydrogel adsorbent for dye removal. *Colloids and Surfaces A: Physicochemical and Engineering Aspects*, 652, 129632. <https://doi.org/10.1016/j.colsurfa.2022.129632>
- Xu, Z., Wu, K., Luo, H., Wang, Q., Zhang, T. C., Chen, X., Rong, H., & Fang, Q. (2022). Electro-responsive SEMI-IPN hydrogel with enhanced responsive property for forward osmosis desalination. *Journal of Applied Polymer Science*, 139(7), 51650. <https://doi.org/10.1002/app.51650>
- Yilmaz, E., Guzel Kaya, G., & Deveci, H. (2019). Removal of methylene blue dye from aqueous solution by semi-interpenetrating polymer network hybrid hydrogel: Optimization through Taguchi method. *Journal of Polymer Science Part A: Polymer Chemistry*, 57(10), 1070–1078. <https://doi.org/10.1002/pola.29361>
- Zendehdel, M., Barati, A., Alikhani, H., & Hekmat, A. (2010). Removal of methylene blue dye from wastewater by adsorption onto semi-inpenetrating polymer network hydrogels composed of acrylamide and acrylic acid copolymer and polyvinyl alcohol.
- Zhai, X., Chen, X., Shi, X., Wang, S., Wang, S., Wu, Q., Ma, Y., Wang, J., Wan, D., & Pan, J. (2022). Simultaneously enhancing purification, catalysis and in situ separation in a continuous cross-flow catalytic degradation process of multi-component organic pollutants by a double-layer PVDF composite membrane. *Journal of Environmental Chemical Engineering*, 10(2), 107160. <https://doi.org/10.1016/j.jece.2022.107160>
- Zhang, M., Li, Y., Yang, Q., Huang, L., Chen, L., & Xiao, H. (2018). Adsorption of methyl violet using pH- and temperature-sensitive cellulose filament/poly(NIPAM-co-AAc) hybrid hydrogels. *Journal of Materials Science*, 53(16), 11837–11854. <https://doi.org/10.1007/s10853-018-2342-0>
- Zhang, P., Yin, J., & Jiang, X. (2014). Hyperbranched Poly(ether amine) (hPEA)/Poly(vinyl alcohol) (PVA) Interpenetrating Network (IPN) for Selective Adsorption and Separation of Guest Homologues. *Langmuir*, 30(48), 14597–14605. <https://doi.org/10.1021/la502869n>
- Zhao, S., Zhou, F., Li, L., Cao, M., Zuo, D., & Liu, H. (2012). Removal of anionic dyes from aqueous solutions by adsorption of chitosan-based Semi IPN hydrogel composites. *Composites Part B: Engineering*, 43(3), 1570–1578. <https://doi.org/10.1016/j.compositesb.2012.01.015>
- Zhao, Z., Huang, Y., Wu, Y., Li, S., Yin, H., & Wang, J. (2021).  $\alpha$ -ketoglutaric acid modified chitosan/polyacrylamide semi-interpenetrating polymer network hydrogel for removal of heavy metal ions. *Colloids and Surfaces A: Physicochemical and Engineering Aspects*, 628, 127262. <https://doi.org/10.1016/j.colsurfa.2021.127262>
